# Supplementary material for: A performance study of enhanced visible-light-driven photocatalysis and magnetical protein separation of multifunctional yolk–shell nanostructures
Source: Royal Society of Chemistry journal article supplement (doi:10.1039/c3ta12272g), 2013-01-01
Supplement: c3ta12272g.pdf [file c3ta12272g.pdf]

Supporting Information:

**Performance study of enhanced visible-light-driven  
photocatalysis and magnetical protein separation of  
multifunctional yolk-shell nanostructures**

**Wenjun Dong,<sup>\*a</sup> Yanjun Zhu,<sup>a</sup> Huandi Huang,<sup>a</sup> Liangshu Jiang,<sup>a</sup> Huijuan Zhu,<sup>a</sup>  
Chaorong Li,<sup>a</sup> Benyong Chen,<sup>a</sup> Zhan Shi,<sup>b</sup> Ge Wang<sup>c</sup>**

<sup>a</sup> Center for Nanoscience and Nanotechnology, Department of Physics, Key Laboratory of Advanced Textile Materials and Manufacturing Technology, Ministry of Education of China, Zhejiang Sci-Tech University, Hangzhou 310018, P R China.

E-mail: [wenjundong@zstu.edu.cn](mailto:wenjundong@zstu.edu.cn)

<sup>b</sup> State Key Laboratory of Inorganic Synthesis and Preparative Chemistry, College of Chemistry, Jilin University, Changchun 130012, P R China.

<sup>c</sup> School of Materials Science and Engineering, University of Science and Technology Beijing, Beijing, 100083, P R China.

To whom correspondence should be addressed. E-mail: [wenjundong@zstu.edu.cn](mailto:wenjundong@zstu.edu.cn); Tel.: +86-571-86843587. Fax: +86-571-86843587.

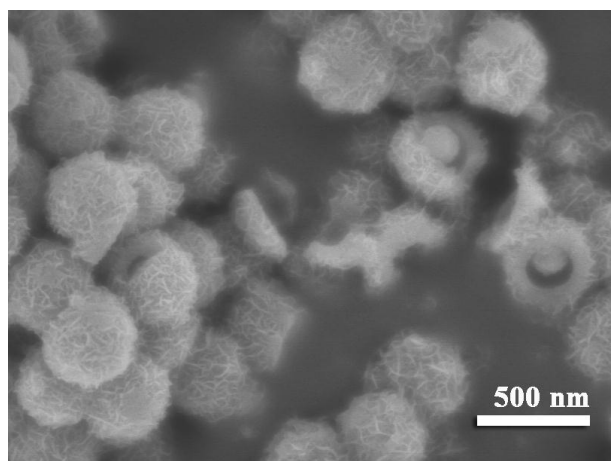

Figure S1. SEM image of the purposely selected broken  $\text{SiO}_2@ \text{TiO}_2@ \text{Ni}(\text{OH})_2$  to reveal the yolk-shell structure.

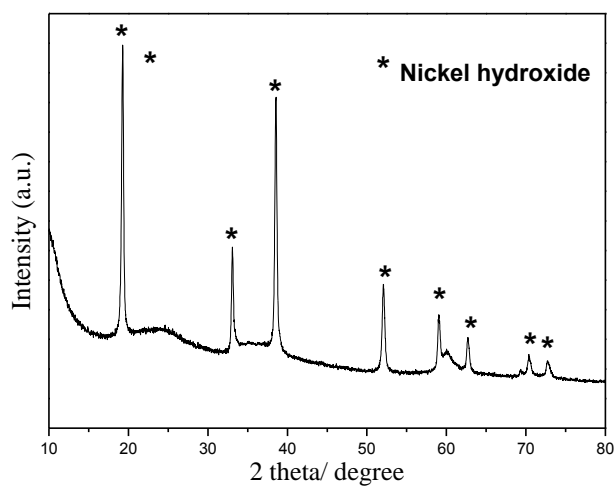

Figure S2. XRD pattern of the product obtained by coating the  $\text{Ni}(\text{OH})_2$  on the surface of the  $\text{SiO}_2@ \text{TiO}_2$  microspheres at  $110^\circ\text{C}$  for 1h.

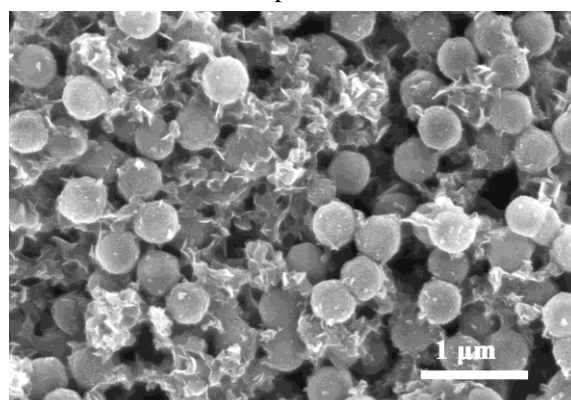

Figure S3. SEM image of as-obtained product obtained with NaOH as the precipitation agent.

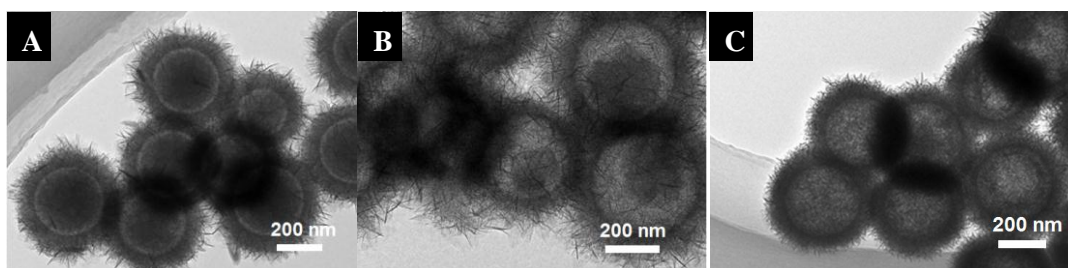

Figure S4. TEM images of (A, B)  $\text{SiO}_2@\text{TiO}_2@\text{Ni}(\text{OH})_2$  YSNs with different  $\text{SiO}_2$  diameters, and (C)  $\text{TiO}_2@\text{Ni}(\text{OH})_2$  hollow microspheres.

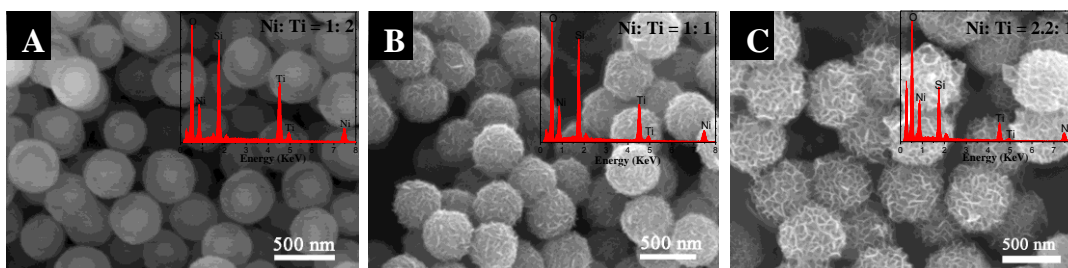

Figure S5 SEM images of the  $\text{SiO}_2@\text{TiO}_2@\text{Ni}(\text{OH})_2$  YSNs with different overall diameters: (A)  $(410\pm 20)$  nm, (B)  $(480\pm 20)$  nm, (C)  $(600\pm 30)$  nm.

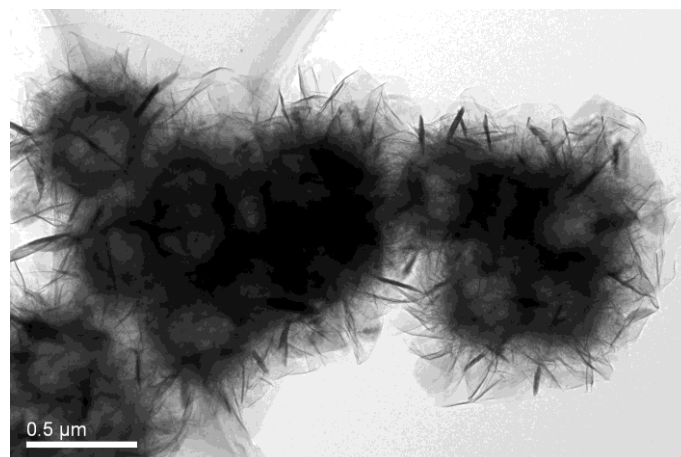

Figure S6 TEM image of as-obtained  $\text{SiO}_2@\text{TiO}_2@\text{Ni}(\text{OH})_2$  product prepared in nickel nitrate solution with concentration of 80 mM  $\text{Ni}(\text{NO}_3)_2$ .

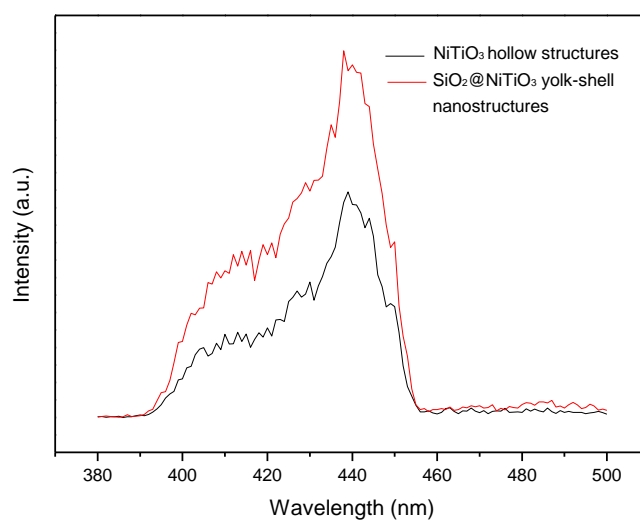

Figure S7 PL Photoluminescence spectra measured at room temperature for NiTiO<sub>3</sub> hollow structures and SiO<sub>2</sub>@NiTiO<sub>3</sub> yolk-shell nanostructures. The excitation wavelength was 221 nm.

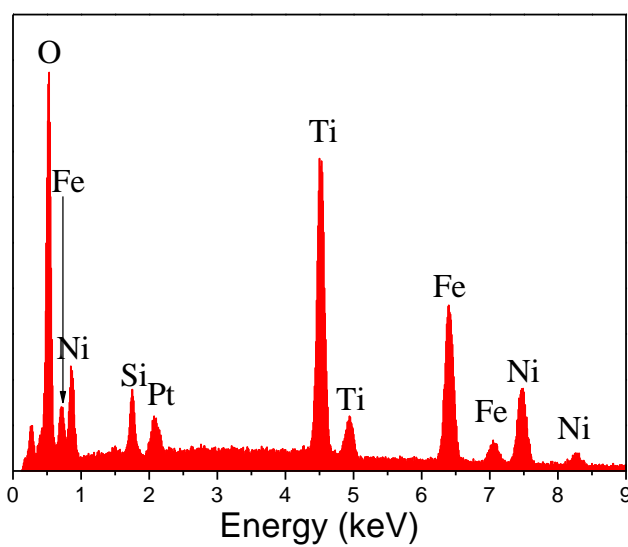

Figure S8. EDX spectra of the final Fe<sub>3</sub>O<sub>4</sub>@TiO<sub>2</sub>@Ni(OH)<sub>2</sub> YSNs.
